# Supplementary material
Source: PubMed Central journal article supplement (PMC7592507)
Supplement: ehp6976.s001.acco.pdf [file ehp6976.s001.acco.pdf]

**Note to readers with disabilities:** *EHP* strives to ensure that all journal content is accessible to all readers. However, some figures and Supplemental Material published in *EHP* articles may not conform to [508 standards](#) due to the complexity of the information being presented. If you need assistance accessing journal content, please contact [ehp508@niehs.nih.gov](mailto:ehp508@niehs.nih.gov). Our staff will work with you to assess and meet your accessibility needs within 3 working days.

### **Supplemental Material**

#### **Assessing United States County-Level Exposure for Research on Tropical Cyclones and Human Health**

G. Brooke Anderson, Joshua Ferreri, Mohammad Al-Hamdan, William Crosson, Andrea Schumacher, Seth Guikema, Steven Quiring, Dirk Eddelbuettel, Meilin Yan, and Roger D. Peng

#### **Table of Contents**

**Figure S1.** Examples of storms where some storm-related rainfall occurred 500 km or further from the storm's track. The red line on each map shows the track of the storm. The color of each county in the map gives the cumulative precipitation in the county from two days before to one day after the storm's closest approach (in mm). The blue outline identifies the collection of counties that were classified as "exposed" based on the rainfall exposure criteria (Table 1 of main text), which includes the constraint that the storm must have come within 500 km of the county.

**Figure S2.** Comparison of county-level estimates of peak sustained surface wind for Hurricane Ike in 2008 (top) and Hurricane Sandy in 2012 (bottom). Each map shows the estimated peak sustained surface wind classification (<34 kt; 34–49.9 kt; 50–63.9 kt; >64 kt) for each study county. The maps labelled "Modeled" (left) shows the classifications based on modeled peak sustained surface wind, which were included in the open-source data as the main wind metric and used in further analysis in this research. The maps labelled "Extended Best Tracks" (right) show classifications based on the wind radii given in HURDAT2 (included as a secondary wind metric in the open-source data). The red lines show the storms' tracks.

**Figure S3.** Average number of storm exposures per decade in U.S. counties for each single-hazard exposure metric, limited analysis to years for which data on all five exposures were available (1996–2011). The criteria behind each of the five metrics is given in Table 1 of the main text.

**Figure S4.** Differences in the counties assessed as “exposed”, based on different exposure metrics, for a sample of storms. These sample storms were selected as the storms with largest extent (as measured by the number of counties exposed based on any metric) from each of the clusters shown in the Jaccard heatmap in the main text (Figure 7; a similar map for Hurricane Ivan in 2004 is shown in Figure 6 of the main text).

**Table S1.** Reasons behind the choices of thresholds for binary exposure classifications, as well as discussion of some other reasonable choices. These are provided for the three exposure metrics for which our database includes continuous data, and so a threshold is selected to determine binary exposure based on the metric. This table provides reasoning for the choice of threshold used in this paper as well as guidance on other thresholds that could be considered, depending on the hypothesized pathways for an epidemiological study.

**Table S2.** Precipitation correlation during all versus high-precipitation events. The same sample of counties is shown as in Figure 2 of the main text. Events are cases where a tropical cyclone came within 500 km of each of the listed counties. The number of total events gives the sum of all points shown on the main plot for the county in Figure 2 of the main text. The Spearman correlation for all events is the same as that shown in Figure 2 of the main text. High-precipitation events are those for which storm-associated precipitation was 75 mm or higher based on at least one of the two measures considered in this comparison (NLDAS-2 reanalysis data and ground-based stations). The Spearman correlation between these two precipitation data sources is given for these high-precipitation events in the last column of the table.

**Table S3.** Agreement between wind-based exposure assessment and a distance-based proxy of storm exposure for tropical cyclones with at least 200 counties assessed as exposed based on at least one exposure metric considered in this study. Numbers are out of 2,396 counties in the study area (states in the eastern half of the US; Figure 1 of the main text). Exposure assessment is based on the thresholds given in Table 1 of the main text. The Jaccard index shown in Figure 7 of the main text is calculated as the value in the second column divided by the sum of numbers in the second through fourth columns. Storms are ordered based on the number of counties assessed as exposed to at least one of these two exposure metrics.

**Table S4.** Agreement between rain-based exposure assessment and a distance-based proxy of storm exposure for tropical cyclones with at least 200 counties assessed as exposed based on at least one exposure metric considered in this study. Numbers are out of 2,396 counties in the study area (states in the eastern half of the US; Figure 1 of the main text). Exposure assessment is based on the thresholds given in Table 1 of the main text. The Jaccard index shown in Figure 7 of the main text is calculated as the value in the second column divided by the sum of numbers in the second through fourth columns. Storms are ordered based on the number of counties assessed as exposed to at least one of these two exposure metrics.

**Table S5.** Agreement between flood-based exposure assessment and a distance-based proxy of storm exposure for tropical cyclones with at least 200 counties assessed as exposed based on at least one exposure metric considered in this study. Numbers are out of 2,396 counties in the study area (states in the eastern half of the US; Figure 1 of the main text). Exposure assessment is based on the thresholds given in Table 1 of the main text. The Jaccard index shown in Figure 7 of the main text is calculated as the value in the second column divided by the sum of numbers in the second through fourth columns. Storms are ordered based on the number of counties assessed as exposed to at least one of these two exposure metrics.

**Table S6.** Agreement between tornado-based exposure assessment and a distance-based proxy of storm exposure for tropical cyclones with at least 200 counties assessed as exposed based on at least one exposure metric considered in this study. Numbers are out of 2,396 counties in the study area (states in the eastern half of the US; Figure 1 of the main text). Exposure assessment is based on the thresholds given in Table 1 of the main text. The Jaccard index shown in Figure 7 of the main text is calculated as the value in the second column divided by the sum of numbers in the second through fourth columns. Storms are ordered based on the number of counties assessed as exposed to at least one of these two exposure metrics.

## References

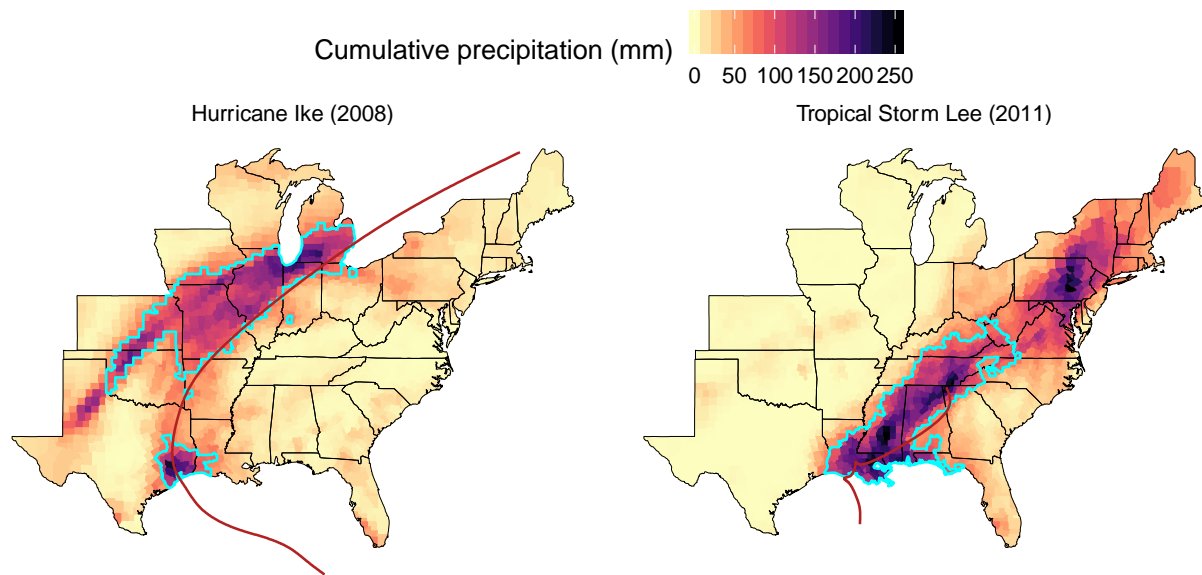

**Figure S1:** Examples of storms where some storm-related rainfall occurred 500 km or further from the storm's track. The red line on each map shows the track of the storm. The color of each county in the map gives the cumulative precipitation in the county from two days before to one day after the storm's closest approach (in mm). The blue outline identifies the collection of counties that were classified as "exposed" based on the rainfall exposure criteria (Table 1 of main text), which includes the constraint that the storm must have come within 500 km of the county.

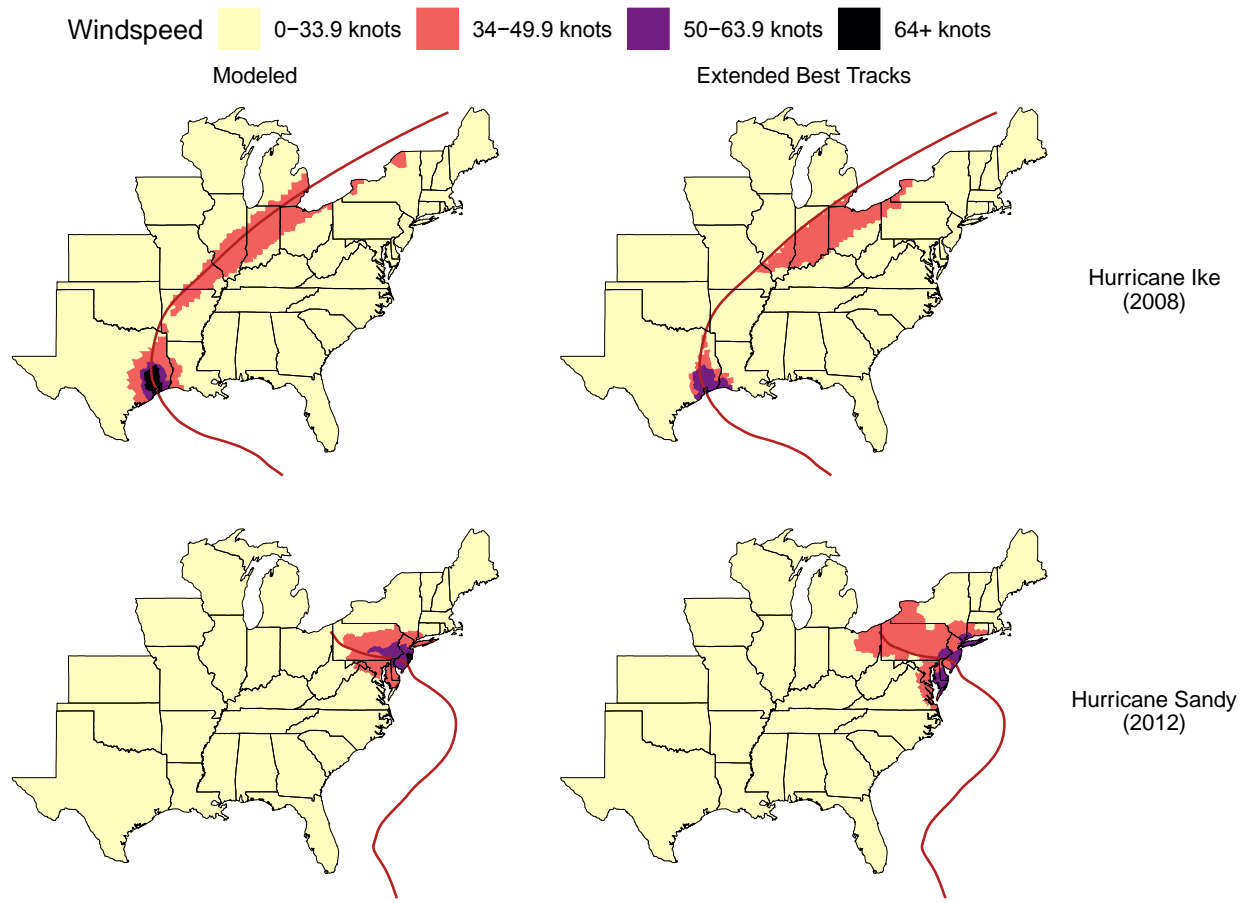

**Figure S2:** Comparison of county-level estimates of peak sustained surface wind for Hurricane Ike in 2008 (top) and Hurricane Sandy in 2012 (bottom). Each map shows the estimated peak sustained surface wind classification (<34 kt; 34–49.9 kt; 50–63.9 kt; ≥64 kt) for each study county. The maps labelled “Modeled” (left) shows the classifications based on modeled peak sustained surface wind, which were included in the open-source data as the main wind metric and used in further analysis in this research. The maps labelled “Extended Best Tracks” (right) show classifications based on the wind radii given in HURDAT2 (included as a secondary wind metric in the open-source data). The red lines show the storms’ tracks.

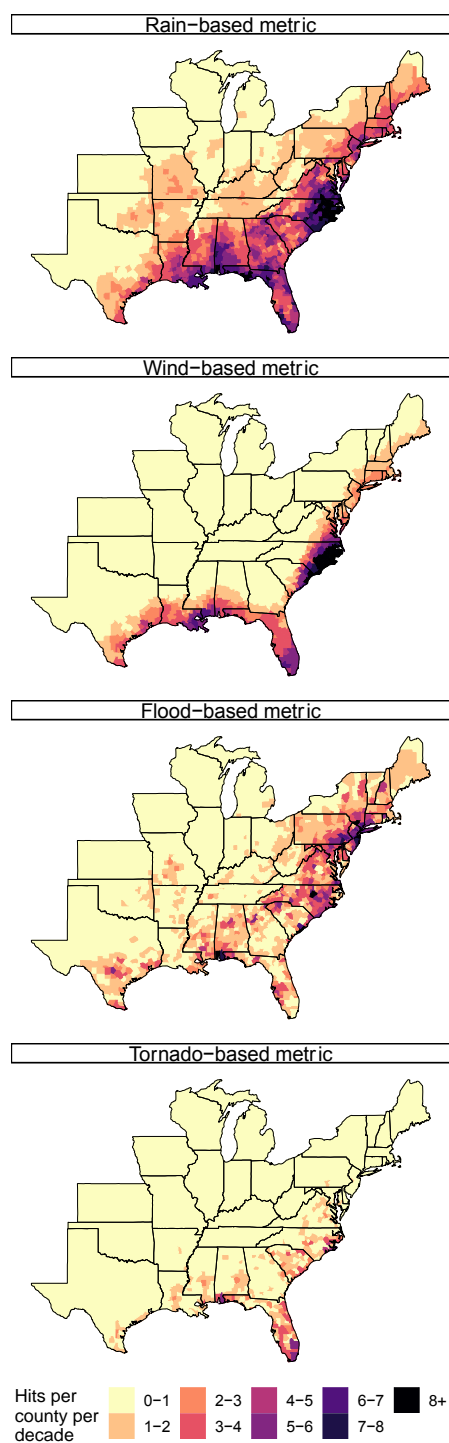

**Figure S3:** Average number of storm exposures per decade in U.S. counties for each single-hazard exposure metric, limited analysis to years for which data on all five exposures were available (1996–2011). The criteria behind each of the five metrics is given in Table 1 of the main text.

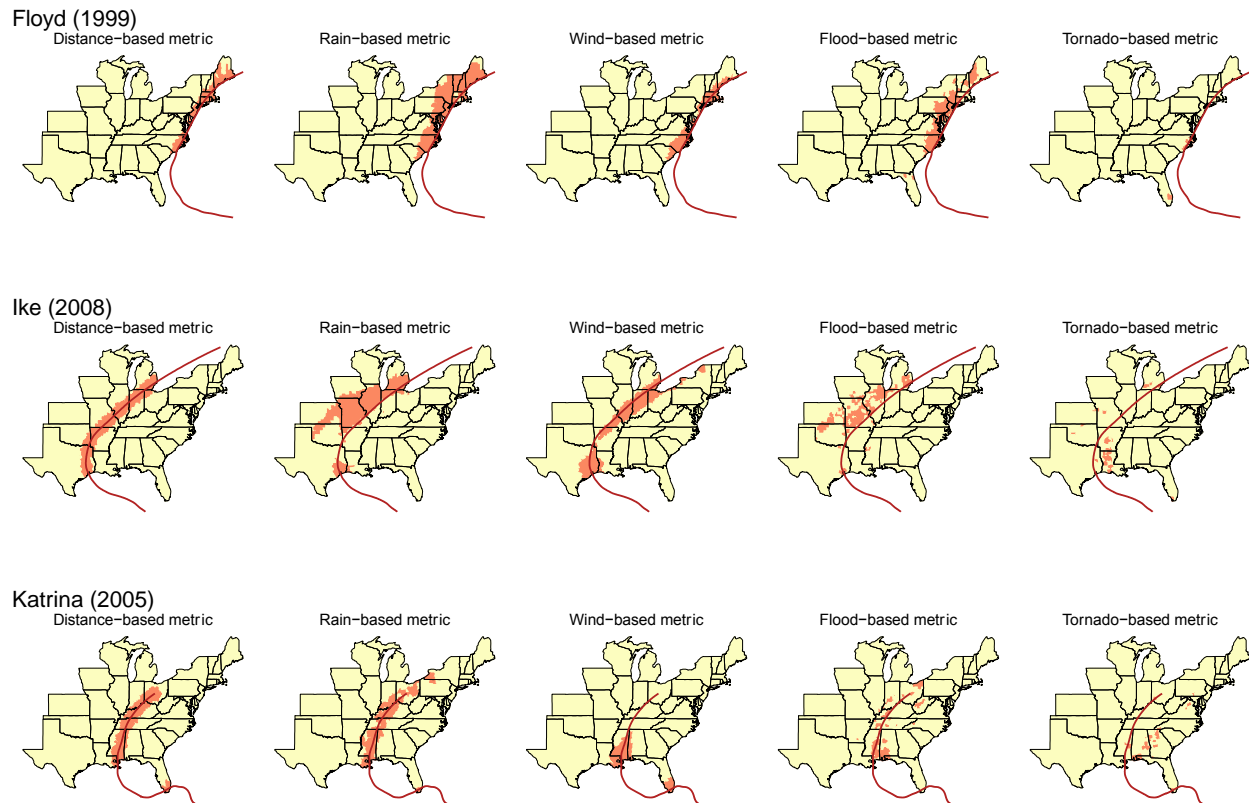

**Figure S4:** Differences in the counties assessed as “exposed”, based on different exposure metrics, for a sample of storms. These sample storms were selected as the storms with largest extent (as measured by the number of counties exposed based on any metric) from each of the clusters shown in the Jaccard heatmap in the main text (Figure 7; a similar map for Hurricane Ivan in 2004 is shown in Figure 6 of the main text).

**Table S1:** Reasons behind the choices of thresholds for binary exposure classifications, as well as discussion of some other reasonable choices. These are provided for the three exposure metrics for which our database includes continuous data, and so a threshold is selected to determine binary exposure based on the metric. This table provides reasoning for the choice of threshold used in this paper as well as guidance on other thresholds that could be considered, depending on the hypothesized pathways for an epidemiological study.

| Metric          | Threshold choice                                                                                                                                                                                                                                                                                                                                                                                                                                                                                                                                                                                                                                                                                                                                                                                                                                                                                                                                                                                                                                                                                                                                                                                                                                                                                                                                                                                                                                                                                                                                                                                                                                                                                                                                                                                                                                                                                                                                                                                                                                                                                                                                                                         |
|-----------------|------------------------------------------------------------------------------------------------------------------------------------------------------------------------------------------------------------------------------------------------------------------------------------------------------------------------------------------------------------------------------------------------------------------------------------------------------------------------------------------------------------------------------------------------------------------------------------------------------------------------------------------------------------------------------------------------------------------------------------------------------------------------------------------------------------------------------------------------------------------------------------------------------------------------------------------------------------------------------------------------------------------------------------------------------------------------------------------------------------------------------------------------------------------------------------------------------------------------------------------------------------------------------------------------------------------------------------------------------------------------------------------------------------------------------------------------------------------------------------------------------------------------------------------------------------------------------------------------------------------------------------------------------------------------------------------------------------------------------------------------------------------------------------------------------------------------------------------------------------------------------------------------------------------------------------------------------------------------------------------------------------------------------------------------------------------------------------------------------------------------------------------------------------------------------------------|
| <b>Distance</b> | Distance-based exposure was determined based on whether the storm track came within 100 km of county population mean center. This threshold has been used in prior research as a proxy for exposure to hazards from the storm (e.g., Grabich et al. 2015a). Tropical cyclones vary dramatically in size: US tropical cyclones have been observed with radii to maximum winds as small as 20 km and as large as 200 km (Mallin and Corbett 2006; Quiring et al. 2011), and dangerous winds can extend beyond these maximum winds. One study assessed county-level risk and exposure based on a three-tiered definition, with primary counties being those closest to the storm track on either side, secondary counties being adjacent to primary counties, and tertiary counties adjacent to secondary counties, which resulted in an average distance radius of 120 km on either side of the storm track (Czajkowski et al. 2011). Other distance thresholds that could be considered include 60 km and 30 km, both of which have been used in previous research (Grabich et al. 2015a; Grabich et al. 2015b; Currie and Rossin-Slater 2013). However, based on the results presented in the main manuscript, hazard-based metrics should often be used directly rather than a distance-based proxy.                                                                                                                                                                                                                                                                                                                                                                                                                                                                                                                                                                                                                                                                                                                                                                                                                                                                                    |
| <b>Rain</b>     | Rain-based exposure was determined based on whether the county had cumulative rainfall of $\geq 75$ mm over the period from two days before to one day after the storm's closest approach and the storm track came within 500 km of the county population mean center. One recent study has highlighted that a two-year rainfall value (which is the median annual maximum rainfall) for a location can provide a useful threshold in identifying rainfall events with potential for societal impacts (Bosma et al. 2020). For some of the more northern, inland communities included in our study area, the two-year rainfall value for two-, three- and four-day windows is in the 65–85 mm range. For example, Pittsburgh, PA, has two- year rainfall values of 69 mm for a two-day window, 74 mm for a three-day window, and 78 mm for a four-day window (US NOAA 2020), consistent with the 75 mm threshold we selected for exposure classification in this paper. However, other thresholds, particularly higher thresholds, would be reasonable in some cases. For example, the two-year rainfall values tend to be much higher in counties of the study area that are further south and close to the coast. The two-year rainfall value for Miami for a three-day window, for example is 180 mm (US NOAA 2020). A variety of definitions have been used previously to identify both extreme or heavy rain (whether associated with a tropical cyclone or not) and tropical cyclone-associated rain. In defining precipitation associated with tropical cyclones, studies have used thresholds of 12.5 mm per day as a metric of regions of “moderately heavy” rainfall (Zhou and Matyas 2017) and, as a lower threshold, a lower limit of 10 mm of total storm precipitation—in conjunction with proximity to the storm's center—in identifying tropical cyclone precipitation events at a location (Feldmann et al. 2019). Other definitions of extreme rain events—including but not limited to tropical cyclone-associated rainfall—are higher than the threshold we use here—for example, one paper defined extreme rain events as cases in which a gauge reported 125 mm or |

more of rain in 24 hours (Schumacher and Johnson 2006). Studies have also used definitions that are relative to the norms for a given location (e.g., 24 hour rainfall totals over the 50-year return value for the location, which the part of the US east of the Rocky Mountains range from 3.5 in [89 mm] to 13 in [330 mm]) (Schumacher and Johnson 2006; Schumacher and Johnson 2005; Stevenson and Schumacher 2014).

## **Wind**

Wind-based exposure was determined based on whether modeled storm-associated peak sustained surface wind was  $\geq 34$  kts at the county's population mean center. This threshold is being applied to local winds for each county, and it represents the threshold for gale-force winds on the Beaufort wind scale. This limit is used as the outer limit in measuring storm size through the US National Hurricane Center's wind radii for tropical cyclone forecasts (Cangialosi and Landsea 2016). Other thresholds could be selected based on other points on the Beaufort scale—for example,  $\geq 48$  kts for capturing storm-force winds or  $\geq 64$  kts for capturing hurricane-force winds. As a note, hurricane-force winds will be rarely experienced for counties, as it will likely only be observed for very severe storms and even for those, only for counties near the storm's landfall. Many presentations of the Beaufort wind scale include descriptions of the conditions that winds in each category would produce both over land and at sea.

---

**Table S2:** Precipitation correlation during all versus high-precipitation events. The same sample of counties is shown as in Figure 2 of the main text. Events are cases where a tropical cyclone came within 500 km of each of the listed counties. The number of total events gives the sum of all points shown on the main plot for the county in Figure 2 of the main text. The Spearman correlation for all events is the same as that shown in Figure 2 of the main text. High-precipitation events are those for which storm-associated precipitation was 75 mm or higher based on at least one of the two measures considered in this comparison (NLDAS-2 reanalysis data and ground-based stations). The Spearman correlation between these two precipitation data sources is given for these high-precipitation events in the last column of the table.

| County           | All events       |                      | High-precipitation events |                      |
|------------------|------------------|----------------------|---------------------------|----------------------|
|                  | Number of events | Spearman correlation | Number of events          | Spearman correlation |
| Miami-Dade, FL   | 65               | 0.94                 | 18                        | 0.49                 |
| Harris, TX       | 38               | 0.93                 | 10                        | 0.84                 |
| Mobile, AL       | 50               | 0.95                 | 20                        | 0.57                 |
| Orleans, LA      | 55               | 0.89                 | 13                        | 0.95                 |
| Fulton, GA       | 48               | 0.95                 | 12                        | 0.69                 |
| Charleston, SC   | 73               | 0.94                 | 17                        | 0.65                 |
| Wake, NC         | 61               | 0.98                 | 12                        | 0.84                 |
| Baltimore, MD    | 33               | 0.92                 | 5                         | 0.70                 |
| Philadelphia, PA | 52               | 0.96                 | 6                         | 0.77                 |

**Table S3:** Agreement between wind-based exposure assessment and a distance-based proxy of storm exposure for tropical cyclones with at least 200 counties assessed as exposed based on at least one exposure metric considered in this study. Numbers are out of 2,396 counties in the study area (states in the eastern half of the US; Figure 1 of the main text). Exposure assessment is based on the thresholds given in Table 1 of the main text. The Jaccard index shown in Figure 7 of the main text is calculated as the value in the second column divided by the sum of numbers in the second through fourth columns. Storms are ordered based on the number of counties assessed as exposed to at least one of these two exposure metrics.

| Storm            | Exposed for both distance metric and wind metric | Exposed for distance metric but unexposed for wind metric | Exposed for wind metric but unexposed for distance metric | Unexposed for both distance metric and wind metric |
|------------------|--------------------------------------------------|-----------------------------------------------------------|-----------------------------------------------------------|----------------------------------------------------|
| Frances (2004)   | 44                                               | 277                                                       | 13                                                        | 2,062                                              |
| Cindy (2005)     | 17                                               | 304                                                       | 4                                                         | 2,071                                              |
| Dennis (2005)    | 18                                               | 274                                                       | 26                                                        | 2,078                                              |
| Ike (2008)       | 166                                              | 67                                                        | 82                                                        | 2,081                                              |
| Ivan (2004)      | 29                                               | 255                                                       | 27                                                        | 2,085                                              |
| Jeanne (2004)    | 41                                               | 256                                                       | 7                                                         | 2,092                                              |
| Allison (2001)   | 21                                               | 266                                                       | 0                                                         | 2,109                                              |
| Isidore (2002)   | 29                                               | 239                                                       | 7                                                         | 2,121                                              |
| Katrina (2005)   | 66                                               | 175                                                       | 32                                                        | 2,123                                              |
| Gordon (2000)    | 11                                               | 244                                                       | 6                                                         | 2,135                                              |
| Fay (2008)       | 54                                               | 198                                                       | 7                                                         | 2,137                                              |
| Gustav (2008)    | 36                                               | 198                                                       | 23                                                        | 2,139                                              |
| Bertha (1996)    | 179                                              | 4                                                         | 62                                                        | 2,151                                              |
| Danny (1997)     | 45                                               | 184                                                       | 12                                                        | 2,155                                              |
| Arlene (2005)    | 4                                                | 232                                                       | 0                                                         | 2,160                                              |
| Bill (2005)      | 19                                               | 211                                                       | 0                                                         | 2,166                                              |
| Dennis (1999)    | 17                                               | 183                                                       | 13                                                        | 2,183                                              |
| Hanna (2008)     | 135                                              | 57                                                        | 12                                                        | 2,192                                              |
| Isabel (2003)    | 105                                              | 42                                                        | 56                                                        | 2,193                                              |
| Ernesto (2006)   | 93                                               | 99                                                        | 4                                                         | 2,200                                              |
| Helene (2000)    | 18                                               | 174                                                       | 0                                                         | 2,204                                              |
| Rita (2005)      | 26                                               | 139                                                       | 20                                                        | 2,211                                              |
| Fran (1996)      | 46                                               | 105                                                       | 30                                                        | 2,215                                              |
| Earl (1998)      | 133                                              | 36                                                        | 11                                                        | 2,216                                              |
| Floyd (1999)     | 124                                              | 15                                                        | 40                                                        | 2,217                                              |
| Irene (2011)     | 114                                              | 6                                                         | 46                                                        | 2,230                                              |
| Lee (2011)       | 34                                               | 110                                                       | 0                                                         | 2,252                                              |
| Josephine (1996) | 62                                               | 61                                                        | 3                                                         | 2,270                                              |
| Hermine (2010)   | 22                                               | 101                                                       | 1                                                         | 2,272                                              |
| Bonnie (2004)    | 0                                                | 109                                                       | 0                                                         | 2,287                                              |
| Frances (1998)   | 15                                               | 47                                                        | 0                                                         | 2,334                                              |

**Table S4:** Agreement between rain-based exposure assessment and a distance-based proxy of storm exposure for tropical cyclones with at least 200 counties assessed as exposed based on at least one exposure metric considered in this study. Numbers are out of 2,396 counties in the study area (states in the eastern half of the US; Figure 1 of the main text). Exposure assessment is based on the thresholds given in Table 1 of the main text. The Jaccard index shown in Figure 7 of the main text is calculated as the value in the second column divided by the sum of numbers in the second through fourth columns. Storms are ordered based on the number of counties assessed as exposed to at least one of these two exposure metrics.

| Storm            | Exposed for both distance metric and rain metric | Exposed for distance metric but unexposed for rain metric | Exposed for rain metric but unexposed for distance metric | Unexposed for both distance metric and rain metric |
|------------------|--------------------------------------------------|-----------------------------------------------------------|-----------------------------------------------------------|----------------------------------------------------|
| Frances (2004)   | 207                                              | 114                                                       | 257                                                       | 1,818                                              |
| Ivan (2004)      | 124                                              | 160                                                       | 288                                                       | 1,824                                              |
| Isidore (2002)   | 134                                              | 134                                                       | 186                                                       | 1,942                                              |
| Ike (2008)       | 113                                              | 120                                                       | 213                                                       | 1,950                                              |
| Dennis (2005)    | 48                                               | 244                                                       | 124                                                       | 1,980                                              |
| Fay (2008)       | 72                                               | 180                                                       | 163                                                       | 1,981                                              |
| Jeanne (2004)    | 144                                              | 153                                                       | 113                                                       | 1,986                                              |
| Lee (2011)       | 106                                              | 38                                                        | 230                                                       | 2,022                                              |
| Gustav (2008)    | 126                                              | 108                                                       | 137                                                       | 2,025                                              |
| Allison (2001)   | 106                                              | 181                                                       | 67                                                        | 2,042                                              |
| Bill (2003)      | 110                                              | 120                                                       | 117                                                       | 2,049                                              |
| Cindy (2005)     | 78                                               | 243                                                       | 11                                                        | 2,064                                              |
| Floyd (1999)     | 129                                              | 10                                                        | 170                                                       | 2,087                                              |
| Katrina (2005)   | 195                                              | 46                                                        | 58                                                        | 2,097                                              |
| Danny (1997)     | 82                                               | 147                                                       | 54                                                        | 2,113                                              |
| Rita (2005)      | 64                                               | 101                                                       | 103                                                       | 2,128                                              |
| Gordon (2000)    | 5                                                | 250                                                       | 7                                                         | 2,134                                              |
| Arlene (2005)    | 39                                               | 197                                                       | 23                                                        | 2,137                                              |
| Dennis (1999)    | 90                                               | 110                                                       | 56                                                        | 2,140                                              |
| Ernesto (2006)   | 124                                              | 68                                                        | 63                                                        | 2,141                                              |
| Irene (2011)     | 119                                              | 1                                                         | 106                                                       | 2,170                                              |
| Hanna (2008)     | 100                                              | 92                                                        | 33                                                        | 2,171                                              |
| Hermine (2010)   | 44                                               | 79                                                        | 102                                                       | 2,171                                              |
| Fran (1996)      | 89                                               | 62                                                        | 73                                                        | 2,172                                              |
| Earl (1998)      | 72                                               | 97                                                        | 38                                                        | 2,189                                              |
| Bertha (1996)    | 103                                              | 80                                                        | 20                                                        | 2,193                                              |
| Helene (2000)    | 28                                               | 164                                                       | 11                                                        | 2,193                                              |
| Frances (1998)   | 27                                               | 35                                                        | 139                                                       | 2,195                                              |
| Josephine (1996) | 94                                               | 29                                                        | 77                                                        | 2,196                                              |
| Bonnie (2004)    | 56                                               | 53                                                        | 56                                                        | 2,231                                              |
| Isabel (2003)    | 88                                               | 59                                                        | 17                                                        | 2,232                                              |

**Table S5:** Agreement between flood-based exposure assessment and a distance-based proxy of storm exposure for tropical cyclones with at least 200 counties assessed as exposed based on at least one exposure metric considered in this study. Numbers are out of 2,396 counties in the study area (states in the eastern half of the US; Figure 1 of the main text). Exposure assessment is based on the thresholds given in Table 1 of the main text. The Jaccard index shown in Figure 7 of the main text is calculated as the value in the second column divided by the sum of numbers in the second through fourth columns. Storms are ordered based on the number of counties assessed as exposed to at least one of these two exposure metrics.

| Storm            | Exposed for both distance metric and flood metric | Exposed for distance metric but unexposed for flood metric | Exposed for flood metric but unexposed for distance metric | Unexposed for both distance metric and flood metric |
|------------------|---------------------------------------------------|------------------------------------------------------------|------------------------------------------------------------|-----------------------------------------------------|
| Ivan (2004)      | 79                                                | 205                                                        | 238                                                        | 1,874                                               |
| Frances (2004)   | 103                                               | 218                                                        | 122                                                        | 1,953                                               |
| Dennis (2005)    | 21                                                | 271                                                        | 87                                                         | 2,017                                               |
| Jeanne (2004)    | 80                                                | 217                                                        | 77                                                         | 2,022                                               |
| Allison (2001)   | 68                                                | 219                                                        | 71                                                         | 2,038                                               |
| Cindy (2005)     | 52                                                | 269                                                        | 29                                                         | 2,046                                               |
| Ike (2008)       | 48                                                | 185                                                        | 101                                                        | 2,062                                               |
| Isidore (2002)   | 30                                                | 238                                                        | 64                                                         | 2,064                                               |
| Fay (2008)       | 23                                                | 229                                                        | 60                                                         | 2,084                                               |
| Bill (2003)      | 39                                                | 191                                                        | 65                                                         | 2,101                                               |
| Gustav (2008)    | 36                                                | 198                                                        | 57                                                         | 2,105                                               |
| Katrina (2005)   | 47                                                | 194                                                        | 47                                                         | 2,108                                               |
| Gordon (2000)    | 7                                                 | 248                                                        | 19                                                         | 2,122                                               |
| Arlene (2005)    | 11                                                | 225                                                        | 29                                                         | 2,131                                               |
| Danny (1997)     | 39                                                | 190                                                        | 31                                                         | 2,136                                               |
| Floyd (1999)     | 100                                               | 39                                                         | 120                                                        | 2,137                                               |
| Fran (1996)      | 46                                                | 105                                                        | 77                                                         | 2,168                                               |
| Dennis (1999)    | 38                                                | 162                                                        | 19                                                         | 2,177                                               |
| Ernesto (2006)   | 44                                                | 148                                                        | 27                                                         | 2,177                                               |
| Hanna (2008)     | 52                                                | 140                                                        | 26                                                         | 2,178                                               |
| Helene (2000)    | 13                                                | 179                                                        | 20                                                         | 2,184                                               |
| Bertha (1996)    | 27                                                | 156                                                        | 17                                                         | 2,196                                               |
| Irene (2011)     | 108                                               | 12                                                         | 79                                                         | 2,197                                               |
| Rita (2005)      | 4                                                 | 161                                                        | 26                                                         | 2,205                                               |
| Earl (1998)      | 4                                                 | 165                                                        | 11                                                         | 2,216                                               |
| Lee (2011)       | 18                                                | 126                                                        | 36                                                         | 2,216                                               |
| Hermine (2010)   | 16                                                | 107                                                        | 40                                                         | 2,233                                               |
| Isabel (2003)    | 39                                                | 108                                                        | 9                                                          | 2,240                                               |
| Josephine (1996) | 27                                                | 96                                                         | 32                                                         | 2,241                                               |
| Bonnie (2004)    | 10                                                | 99                                                         | 29                                                         | 2,258                                               |
| Frances (1998)   | 8                                                 | 54                                                         | 23                                                         | 2,311                                               |

**Table S6:** Agreement between tornado-based exposure assessment and a distance-based proxy of storm exposure for tropical cyclones with at least 200 counties assessed as exposed based on at least one exposure metric considered in this study. Numbers are out of 2,396 counties in the study area (states in the eastern half of the US; Figure 1 of the main text). Exposure assessment is based on the thresholds given in Table 1 of the main text. The Jaccard index shown in Figure 7 of the main text is calculated as the value in the second column divided by the sum of numbers in the second through fourth columns. Storms are ordered based on the number of counties assessed as exposed to at least one of these two exposure metrics.

| Storm            | Exposed for both distance metric and tornado metric | Exposed for distance metric but unexposed for tornado metric | Exposed for tornado metric but unexposed for distance metric | Unexposed for both distance metric and tornado metric |
|------------------|-----------------------------------------------------|--------------------------------------------------------------|--------------------------------------------------------------|-------------------------------------------------------|
| Frances (2004)   | 6                                                   | 315                                                          | 66                                                           | 2,009                                                 |
| Ivan (2004)      | 36                                                  | 248                                                          | 55                                                           | 2,057                                                 |
| Cindy (2005)     | 27                                                  | 294                                                          | 11                                                           | 2,064                                                 |
| Jeanne (2005)    | 13                                                  | 284                                                          | 22                                                           | 2,077                                                 |
| Dennis (2005)    | 0                                                   | 292                                                          | 6                                                            | 2,098                                                 |
| Allison (2001)   | 14                                                  | 273                                                          | 9                                                            | 2,100                                                 |
| Katrina (2005)   | 8                                                   | 233                                                          | 38                                                           | 2,117                                                 |
| Fay (2008)       | 15                                                  | 237                                                          | 26                                                           | 2,118                                                 |
| Isidore (2002)   | 1                                                   | 267                                                          | 6                                                            | 2,122                                                 |
| Ike (2008)       | 4                                                   | 229                                                          | 31                                                           | 2,132                                                 |
| Gordon (2000)    | 1                                                   | 254                                                          | 8                                                            | 2,133                                                 |
| Gustav (2008)    | 9                                                   | 225                                                          | 28                                                           | 2,134                                                 |
| Bill (2003)      | 4                                                   | 226                                                          | 22                                                           | 2,144                                                 |
| Arlene (2005)    | 2                                                   | 234                                                          | 7                                                            | 2,153                                                 |
| Danny (1997)     | 9                                                   | 220                                                          | 4                                                            | 2,163                                                 |
| Rita (2005)      | 8                                                   | 157                                                          | 41                                                           | 2,190                                                 |
| Dennis (1999)    | 0                                                   | 200                                                          | 1                                                            | 2,195                                                 |
| Helene (2000)    | 5                                                   | 187                                                          | 6                                                            | 2,198                                                 |
| Ernesto (2006)   | 2                                                   | 190                                                          | 1                                                            | 2,203                                                 |
| Hanna (2008)     | 0                                                   | 192                                                          | 1                                                            | 2,203                                                 |
| Bertha (1996)    | 13                                                  | 170                                                          | 4                                                            | 2,209                                                 |
| Earl (1998)      | 8                                                   | 161                                                          | 7                                                            | 2,220                                                 |
| Fran (1996)      | 1                                                   | 150                                                          | 4                                                            | 2,241                                                 |
| Lee (2011)       | 14                                                  | 130                                                          | 11                                                           | 2,241                                                 |
| Isabel (2003)    | 0                                                   | 147                                                          | 1                                                            | 2,248                                                 |
| Floyd (1999)     | 11                                                  | 128                                                          | 1                                                            | 2,256                                                 |
| Hermine (2010)   | 1                                                   | 122                                                          | 12                                                           | 2,261                                                 |
| Josephine (1996) | 7                                                   | 116                                                          | 12                                                           | 2,261                                                 |
| Bonnie (2004)    | 13                                                  | 96                                                           | 22                                                           | 2,265                                                 |
| Irene (2011)     | 9                                                   | 111                                                          | 0                                                            | 2,276                                                 |
| Frances (1998)   | 1                                                   | 61                                                           | 10                                                           | 2,324                                                 |

## References for the Supplemental Appendix

- Bosma, Christopher D, Daniel B Wright, Phu Nguyen, James P Kossin, Derrick C Herndon, and J Marshall Shepherd (2020). "An intuitive metric to quantify and communicate tropical cyclone rainfall hazard". *Bulletin of the American Meteorological Society* 101 (2), E206–E220.
- Cangialosi, John P and Christopher W Landsea (2016). "An examination of model and official National Hurricane Center tropical cyclone size forecasts". *Weather and Forecasting* 31 (4), 1293–1300.
- Currie, Janet and Maya Rossin-Slater (2013). "Weathering the storm: hurricanes and birth outcomes". *Journal of Health Economics* 32, 487–503.
- Czajkowski, Jeffrey, Kevin Simmons, and Daniel Sutter (2011). "An analysis of coastal and inland fatalities in landfalling US hurricanes". *Natural Hazards* 59, 1513–1531.
- Feldmann, Monika, Kerry Emanuel, Laiyin Zhu, and Ulrike Lohmann (2019). "Estimation of Atlantic tropical cyclone rainfall frequency in the United States". *Journal of Applied Meteorology and Climatology* 58 (8), 1853–1866.
- Grabich, Shannon C, Jennifer Horney, Charles Konrad, and Danelle T Lobdell (2015a). "Measuring the storm: methods of quantifying hurricane exposure with pregnancy outcomes". *Natural Hazards Review* 17 (1), 06015002.
- Grabich, Shannon C, Whitney R Robinson, Stephanie M Engel, Charles E Konrad, C Konrad, and Jennifer Horney (2015b). "County-level hurricane exposure and birth rates: application of difference- in-differences analysis for confounding control". *Emerging Themes in Epidemiology* 12, 19.
- Mallin, Michael A. and Catherine A. Corbett (2006). "How hurricane attributes determine the extent of environmental effects: Multiple hurricanes and different coastal systems". *Estuaries and Coasts* 29 (6A), 1046–1061.
- Quiring, Steven, Andrea Schumacher, Chris Labosier, and Laiyin Zhu (2011). "Variations in mean annual tropical cyclone size in the Atlantic". *Journal of Geophysical Research: Atmospheres* 116, D09114.
- Schumacher, Russ S and Richard H Johnson (2005). "Organization and environmental properties of extreme-rain-producing mesoscale convective systems". *Monthly Weather Review* 133 (4), 961–976. — (2006). "Characteristics of US extreme rain events during 1999–2003". *Weather and Forecasting* 21 (1), 69–85.
- Stevenson, Stephanie N and Russ S Schumacher (2014). "A 10-year survey of extreme rainfall events in the central and eastern United States using gridded multisensor precipitation analyses". *Monthly Weather Review* 142 (9), 3147–3162.
- United States National Oceanic and Atmospheric Administration (2020). Precipitation Frequency Data Server: Atlas 14 Point Precipitation Frequency Estimates.  
<https://www.nws.noaa.gov/oh/hdsc/index.html>.

Zhou, Yao and Corene J Matyas (2017). "Spatial characteristics of storm-total rainfall swaths associated with tropical cyclones over the Eastern United States". *International Journal of Climatology* 37, 557– 569.
